# Supplementary material
Source: Research Square preprint supplement (doi:10.21203/rs.3.rs-9086169/v1)
Supplement: Supplementary file 2 [file 5ab5e12ceb42f79c8b502e04.docx]

**Supplementary File 3: Additional Illustrative Participant Quotations**

| **Theme** | **Subtheme** | **Participant** | **Quote** |
| --- | --- | --- | --- |
| Foundations of Professional Practice | Professional training and knowledge | PP03 | “very little,” … “didn’t really know what it was for” |
| CP02 | “two or three patients a year” |
| CP06 | “one a week newly prescribed,” |
| PP03 | “The volume of seeing the aspirin request… is probably quite an evidence-based recommendation that we should be supporting in primary care,” |
| CP06 | “I’ve had a look into this” |
| CP06 | “I haven’t read into it that much” |
| CP06 | “there’s no proof of any benefit with that recommendation…” |
| PP01 | “Post-University, there has been not much training,” |
| PP01 | “I don’t recall a course… about upskilling pharmacists about use of medicine in pregnancy or breastfeeding” |
| CP02 | “under recognised or underfunded” |
| Confidence and Navigating Patient and Professional Risk | PP01 | “around a six” |
| CP09 | “semi-confident” |
| CP09 | “not 100% fully” |
| CP02 | “a risky area” |
| CP02 | “these patients are high risk by nature of the fact that they’re having an intervention” |
| CP02 | “easier to go along with dispensing the prescription, or just not advising… and referring back to somebody more specialist” |
| PP07 | “Fairly confident I think on the surface. But if there were questions and probes on it, I think I would struggle to get an answer immediately…” |
| CP06 | “If somebody comes in and you refuse to sell, and they didn’t get the aspirin, there’s a risk of miscarriage… But if you do sell it, and she then has gastric bleeding… the pharmacist is liable professionally and legally” |
| PP01 | “I had a pre-eclampsia risk… that’s probably where I got most of my knowledge” |
| CP09 | “seeing the effects of it not being used” |
| Barriers and Enablers within the Maternity Care Pathway | Fragmented Communication, Documentation Gaps and Delayed Initiation | PP07 | “we’ve got a letter through, a specialist has recommended something, we consider whether it’s appropriate” |
| PP10 | “we’d see quite a lot of midwife requests for starting the medication” |
| PP03 | “I always expect that the midwives have discussed that… I feel that the midwives and the specialists should be having that conversation, I’m just supporting the process” |
| PP01 | “contact the midwives and ask for the rationale and ask for something in writing to say why they recommend it” |
| PP01 | “very brief” |
| PP04 | “we can never tell if a midwife has had any conversations around that with them” |
| PP05 | “I wouldn’t be happy to add a drug if there isn’t an indication” |
| CP08 | “go and buy it from your pharmacy” |
| CP06 | “if they can show me some documentation that it has been recommended by an obstetrician or a midwife” |
| CP08 | “bouncing back and forth between us, the community pharmacist, and then going back to their obstetrician or back to their doctor” |
| CP08 | “So I do supply on the recommendation of a doctor,” |
| CP08 | “it delays them starting it or potentially missing doses” |
| PP01 | “it’s usually the patient chasing it up… saying, ‘Where is my prescription? How do I get hold of it?’” |
| PP05 | “you have to send an email to this team, and then this team say, ‘We don’t know anything about it’… and really when we would have usually actioned it as an urgent… that might end up taking three days or four days” |
| CP08 | “women may not be able to then… start their aspirin or there will be missed doses, which then could put baby at risk, and potentially mum as well” |
| PP05 | “urgent” |
| PP05 | “high priority” |
| PP03 | “I probably wouldn’t consider it that important at the moment,” |
| PP03 | “all the midwife requests there’s an expectation that there will be a prescription issued” |
| PP05 | “almost a bound duty that a GP is going to supply it” |
| PP07 | “I’m not a prescriber,” |
| PP07 | “they’re leaving it in your hands” |
| PP07 | “I would only assume that the specialist knows that there’s evidence to support it” |
| Aspirin licensing status & governance constraints on supply | CP02 | “complicated by the fact it’s not a licenced indication” |
| CP02 | “does open you up to litigation… should there then be complications” |
| PP07 | “I personally don’t think it should be sold, I think it should be on prescription” |
| CP09 | “grey area, because it’s not clinically licenced as an indication” |
| Role of the pharmacist & professional boundaries | Role Boundaries and Scope of Practice | CP02 | “I don’t feel confident that it is part of a community pharmacist role” |
| CP02 | “a step far removed from the pharmacy setting” |
| CP08 | “without some process in place, whether that’s a PGD or a protocol or something like that and training” |
| CP08 | “happy to supply it via… a PGD” |
| PP01 | PGDs might “reduce the need for a GP surgery to get involved so much” |
| Reactive Practice and Limited Professional Autonomy | CP02 | “if there was a prescription… I probably wouldn’t have challenged it in any way” |
| Professional motivation with structural constraint | CP06 | “knowing that you’re helping just a little bit… what else would you need to motivate you?” |
| PP03 | “as healthcare professionals we want the best for our patients” |
| Enablers of Clinical Engagement: Resources, Records and Team Support | PP01 | “if I add on any drugs then it comes up with an interaction checker” |
| PP07 | “I can send her a quick text… do you have any further questions?” |
| CP02 | “the less supported side of the scale” |
| CP02 | “I think I would just refer to somebody who was better placed than me” |
| Low-Dose Aspirin as a Special Case within Pregnancy Medicines Use | CP02 | “constipation, heartburn… antihistamines, hay fever treatments” |
| PP01/03 | folic acid / iron - frequent requests |
| PP10 | “it’s important… that we do the safety checks to know when we shouldn’t supply” |
| Communication as an Enabler of Patient Understanding and Adherence | Inconsistent Opportunities for Patient Contact and Follow Up | PP03 | “I’ve never followed up a patient to check that they’ve taken their aspirin” |
| PP01 | "it could be a simple text message or quick call to the patient saying you’ve been recommended aspirin, have you started taking it? Do you have any concerns?” |
| PP01 | “simple text message or quick call…” |
| PP10 | messages “lost in the ether… the patients are the one who suffers” |
| Lack of Standardised Patient Education Materials | PP03 | "If it kind of got sprung up on me I'd say, 'I’d have to look into this and come back to you'” |
| Patient Understanding, Health Literacy and Inequality | CP06 | patients “may not understand the importance of taking it daily, or the importance of if they’ve missed a dose not to worry about it, just to take it the next day” |
| CP06 | “knowing who you’re targeting with the advice and what advice the patient actually needs, and just checking with them where they are with that” |
| PP01 | “general health literacy, if I was to send say for a leaflet for some patients, I know it wouldn’t be understood” |
| PP07 | “even if they do speak English, their ability to read the leaflet might be not there” |
| PP07 | “that person may be able to speak English, but they may not understand written English” |
| PP03 | “we’ve got to try and translate technical language into patient friendly language” |
| Communication Barriers for Underserved Populations | PP01 | “you can’t send them information” |
| PP01 | “you can’t explain things face to face,” |
| CP06 | “Language Lines” |
| CP09 | “Google Translate in the conversation room” |
