# Supplementary material
Source: Research Square preprint supplement (doi:10.21203/rs.3.rs-9086169/v1)
Supplement: Supplementary file 3 [file e15e4c5a4d2519d3a99512fd.docx]

**Interview questions for GPs and Pharmacists**

Thanks for agreeing to take part in this interview.

I want to chat to you today about your role in supporting pregnant women with taking low-dose aspirin to prevent placental dysfunction

What I mean by supporting women with taking it might mean things like:

- Risk assessing women (GP)
- Writing a prescription (GP/ Prescribing Pharmacist)
- Advising women or recommending it (Both)
- Answering their questions about it (Both)
- Dispensing it (Pharmacists)

| **Question**  **(note Alt Prompt is for HCPs who have had little experience of supporting pregnant women with LDA).** | **TDF component** |
| --- | --- |
| 1. Can you tell me a bit about how you are involved with supporting pregnant women with taking clinically recommended/ prescribed medications? | Ice-breaker |
| 1. How frequently do you encounter a woman who has been recommended low dose aspirin in pregnancy?  - are they typically women who have a prescription or women who have been asked to buy it over the counter   And how often do pregnant women seek advice about medicines in pregnancy. | Setting the scene |
| 1. Can you tell me a bit about what you know about the recommendations for pregnant women to take LDA during pregnancy? How familiar are you with the guidance?   **Note- this is not a test, I’m just interested to know how familiar you are with it**   - Who - Why - Dose - How long for (start and end) | Knowledge |
| 1. Can you tell me what your view is of the recommendations for pregnant women to use aspirin in pregnancy? Do you agree with them? |  |
| 1. How do you or how would you deal with a request to supply aspirin over the counter to a pregnant woman?   **Prompt:** The woman has told you it’s been recommended by her midwife/obstetrician  What if a woman says she’s done her own research and wants aspirin | Memory, attention, decisions |
| 1. Are there particular women for whom you might find it more difficult to act on the recommendations?   Prompts: e.g. more complex patients (e.g. multiple medications), language, patient understanding  **Alt prompt:** | Behavioural regulation |
| 1. What factors in your work environment (**alt prompt:** COULD) help or hinder supporting women about low dose aspirin  - Are there particular settings or clinics that help/hinder? - Staff, team factors | Environmental context and resources |
| 1. To what extent is advising pregnant women around taking medications such as low dose aspirin part of your role? | Social/ professional role |
| 1. I would like to hear a bit about what (**alt prompt:** could) make/s it easy to support women with taking low dose aspirin | Skills |
| 1. What about what (**alt prompt:** could) make/s it difficult or harder to support women? | Skills |
| 1. To what extent do you believe that supporting women to take low dose aspirin will impact their baby?   **Prompt**: note positive or negative impacts | Beliefs about consequences |
| 1. To what extent do you believe that supporting women to take low dose aspirin will impact the pregnant woman?   **Prompt**: note positive or negative impacts | Beliefs about Consequences |
| 1. What do you believe are the benefits of supporting women to take low dose aspirin- for you  - Payment/costs may come up; what about professional values |  |
| 1. Are there any costs to you from supporting women to take low dose aspirin | Opportunity-costs |
| 1. What do you think might happen if you didn’t supply aspirin to a woman with placental risk | Beliefs about consequences |
| 1. To what extent is supporting women to take low dose aspirin a priority for you (and your colleagues) | Goals |
| 1. To what extent do you feel you have the necessary skills and knowledge to support women about taking low dose aspirin | Beliefs |
| 1. How confident do you feel about supporting women around taking low dose aspirin | Beliefs about capabilities |
| 1. How important do you think it is to support pregnant women to take low dose aspirin What would motivate you to supply LDA? | Motivation/ goals |
| 1. To what extent to you feel supported to supply low dose aspirin to women:   Prompt: Do you feel under pressure from anyone to do this or not do this? | Social influences |

**Interventions:**

We are considering developing an intervention to support women to take LDA.

- What interventions/support do you think someone in your job role could deliver to support women to take it?
- Do you think that intervention would be achievable in your workplace setting?
- Have you ever delivered any interventions like that?
